# Supplementary material for: Extended Harvest Date Alter Flavonoid Composition and Chromatic Characteristics of Plavac Mali (Vitis vinifera L.) Grape Berries
Source: MDPI journal article supplement (doi:10.3390/foods9091155), 2020-08-21
Supplement: s1 [file s1]

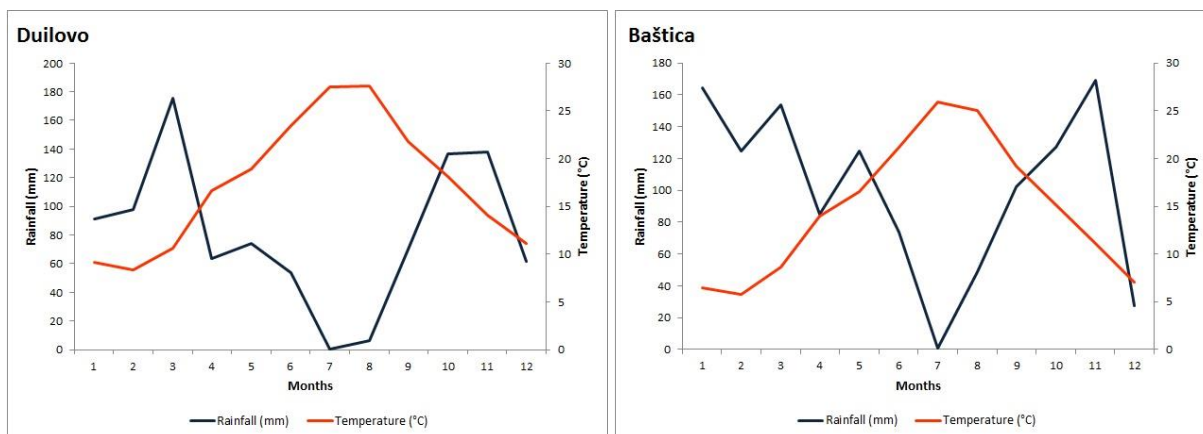

**Figure S1.** Monthly average temperature and rainfall for the two studied locations, Split (Duilovo) and Zadar (Baštica)

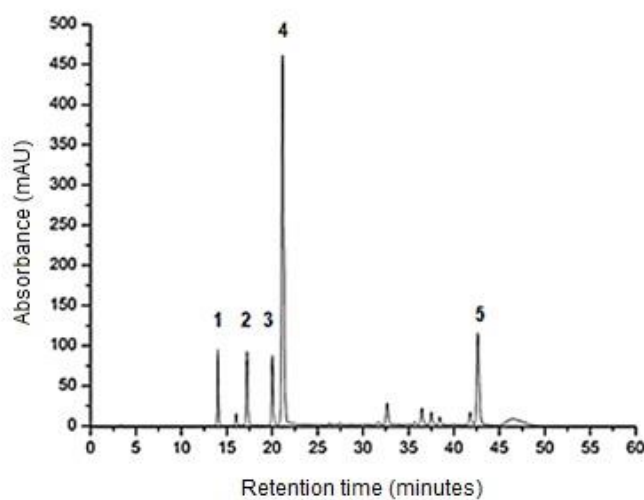

**Figure S2.** HPLC chromatogram of individual anthocyanin monoglucosides in Plavac Mali grape skin extract. The peaks correspond to: 1 delphinidin-3-*O*-glucoside, 2 cyanidin-3-*O*-glucoside, 3 petunidin-3-*O*-glucoside, 4 malvidin-3-*O*-glucoside, 5 peonidin-3-*O*-glucoside.
